# Supplementary material for: Freestanding polypyrrole/carbon nanotube electrodes with high mass loading for robust flexible supercapacitors
Source: Royal Society of Chemistry journal article supplement (doi:10.1039/d0qm00649a), 2020-10-16
Supplement: d0qm00649a1.pdf [file d0qm00649a1.pdf]

## Supporting Information

### Calculation method:

For the electrode:

The areal capacitance  $C_s$  was calculated from the CV curves through the following equation:

$$C_s = \frac{\int IdU}{2vsU_w} = \frac{S}{2vsU_w}$$

where  $v$  is the scan rate,  $S$  is the surface area of the electrode,  $S$  is the area of the closed CV curve and  $U_w$  is the potential window.

The capacitance  $C$  can be calculated from the GCD curves through the following equations also:

$$E_{GCD} = \int IUdt = IS = \frac{CU_w^2}{2}$$

$$C = \frac{2IS}{U_w^2}$$

where  $E_{GCD}$  is the energy stored during the discharging process,  $I$  is the constant current density,  $S$  is the area of the closed discharged curve from the GCD curves,  $C$  is the capacitance and  $U_w$  is the potential window.

For the device:

The  $C_s$  were calculated from the GCD curves same as above.

And the energy density and the average power density can be gained by employing the following equation:

$$E = \frac{C_{ave}U_w^2}{2}$$

$$P = \frac{E}{t}$$

in which  $C_{ave}$  is the  $C_s$  calculated before and  $t$  is the discharge time.

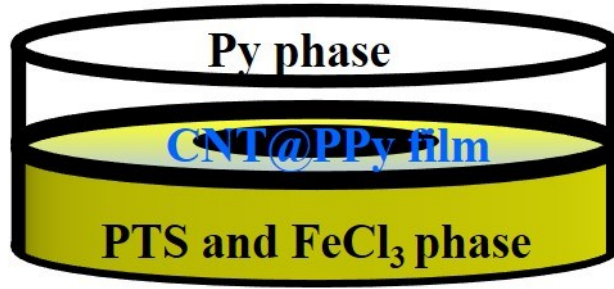

**Fig. S1.** Schematic diagram of the preparation of PPy coated CNT film.

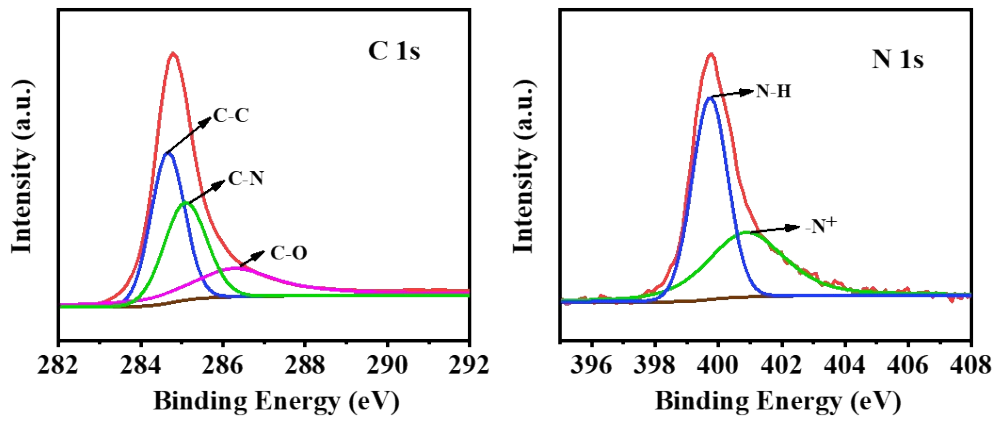

**Fig. S2.** C1s and N1s spectra of CNT@PPy electrodes.

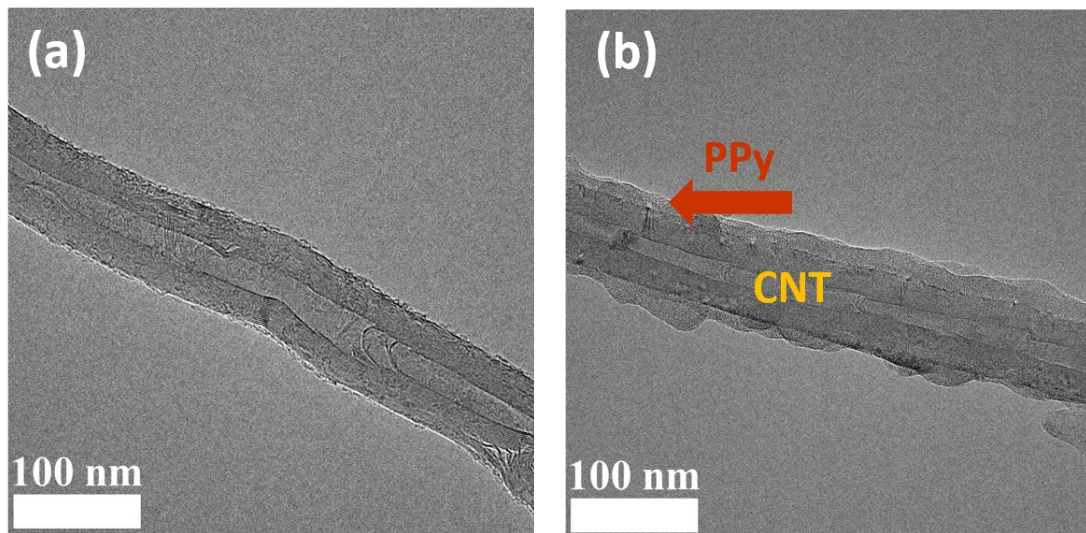

**Fig. S3.** TEM images of pure CNT and CNT@PPy electrodes.

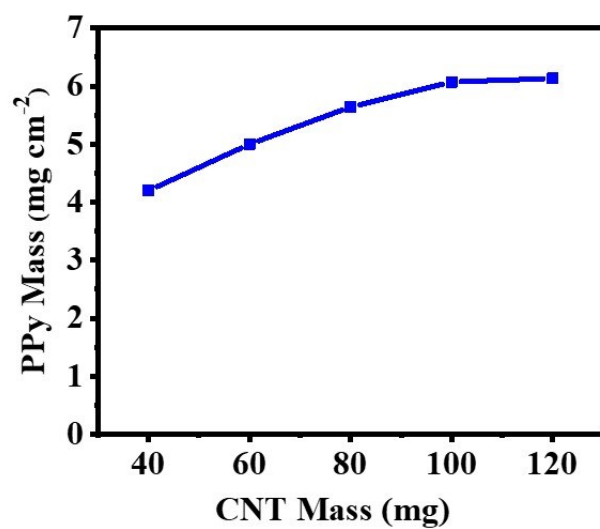

**Fig. S4.** The mass loading of PPy on 40, 60, 80, 100 and 120 mg CNT films.

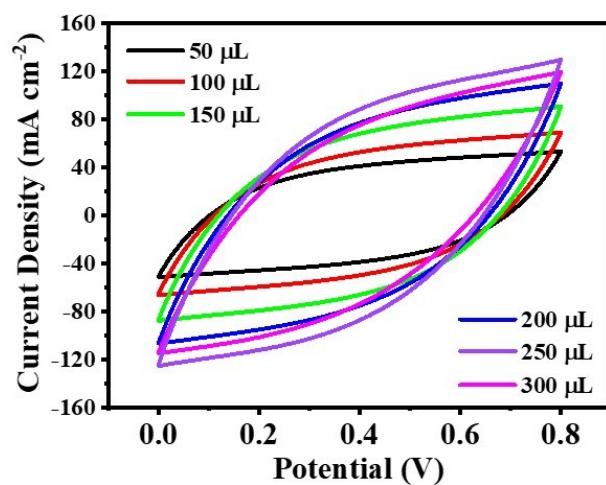

**Fig. S5.** The CV curves at 50 mV s<sup>-1</sup> of the 50, 100, 150, 200, 250 and 300 μL Pyrrole.

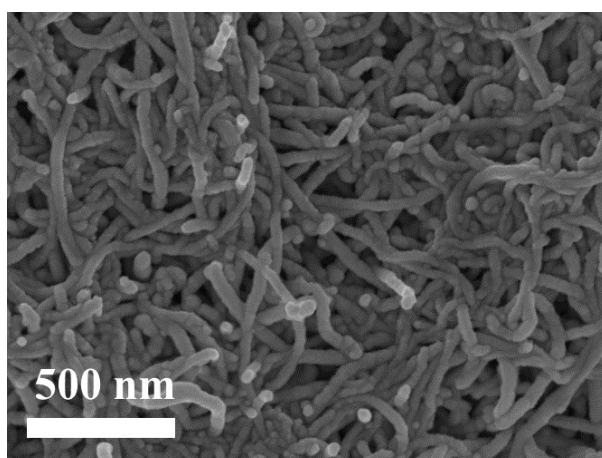

**Fig. S6.** SEM images of the CNT@PPy-100 film after ultrasonication for 30 min.
